# Supplementary material for: Ameliorative effects of Urolithin A against Cadmium-induced NLRP3-mediated pyroptosis and cognitive deficits via regulating Aryl hydrocarbon receptor signaling
Source: Research Square preprint supplement (doi:10.21203/rs.3.rs-6900661/v1), 2025-06-21
Supplement: Supplementary file 1 [file af26e04e0943e61459291d37.docx]

**Ameliorative effects of** **Urolithin A against** **Cadmium-induced NLRP3-mediated pyroptosis and** **cognitive deficits via regulating** **Aryl hydrocarbon receptor signaling**

Ying Zhua,1, Quan Yuan b, 1, Junhong Geng a, Jingyue Hu a, Pu Zhao a, Yue Yan a, Mei Hu c, Xiaoli Liu a, Xiaoying Zhu a, Hua Fan a, *, Dongmei Wang a, **

a College of Basic Medicine and Forensic Medicine, Office of Research & Innovation, The First Affiliated Hospital, College of Clinical Medicine, Henan University of Science and Technology, Luoyang, China

b Henan Province Rongkang Hospital, Luoyang, China

C College of Food Science and Technology, Henan Agricultural University, Zhengzhou, China

1 Ying Zhu and Quan Yuan have been contributed equally to this work

* Correspondence to: Hua Fan, The First Affiliated Hospital, College of Clinical Medicine, Henan University of Science and Technology, Luoyang, China, 263 Kaiyuan Avenue, Luoyang, Henan 471003, P. R. China.

** Correspondence to: Dongmei Wang, College of Basic Medicine and Forensic Medicine, Henan University of Science and Technology, Luoyang, China, 263 Kaiyuan Avenue, Luoyang, Henan 471003, P. R. China.

E-mail addresses: [fanhua19851229@126.com](mailto:fanhua19851229@126.com) (D. Fan) and [wdmzgadyx@163.com](mailto:wdmzgadyx@163.com) (D. Wang)

**Supplementary Material**

**S1. Behavior tests**

*S1.1. Morris water maze (MWM)*

The morris water maze test was used to investigate the memory ability of the mice after Cd exposure as previously reported (C. Wang et al., 2021). During the training period, a platform was placed 1.5 cm below the horizontal in a circular pool filled with opaque water and the mouse was tasked with finding the platform within 60 s. The swimming training continued from day 1 to day 5. The escape latency (time for mice to find the target platform) were recorded. On the sixth day, the platform was removed from the maze. The duration in the target quadrant, the swimming route, and the swimming path length during the 60 s probe trial were recorded.

*S1.2. Y-maze*

The Y-maze test was used to determine hippocampal-dependent short-time spatial recognition memory, and the maze consisted of one start arm and two testing arms (familiar arm and novel arm) at 120° angles (each arm 37 cm length × 8 cm width × 15 cm height) (Wang et al., 2022). At the beginning of training trial, only the two arms (starting arm and familiar arm) were open, while the novel arm arm was locked. Each mouse was placed in the starting arm and allowed to freely explore either one of the arms for 10  min. During the test session, the percentage of time spent exploring the maze was calculated using the following equation: The preference index (PI) = (the time in the novel arm - the time in the familiar arm) / (the time in the novel arm + the time in the familiar arm).

*S1.3. Novel object recognition (NOR)*

The Novel object recognition (NOR) test was carried out in an opaque box (40 cm length × 40 cm width × 40 cm height) based on previous literature to access hippocampus-mediated recognition memory (D. Wang et al., 2021). The mouse was habituated in the box for 10 min on the first day. On day 2, The mouse was first allowed to explore the box containing two identical objects for 10 min. After 24 h, one familiar object was displaced by a novel one with a clearly distinct color and figure. The mouse was allowed to explore the box containing two different objects for 5 min. The time for the mouse spent with each object during the NOR test period was recorded by EthoVisioXT tracking system (Noldus Information Technology). A recognition index (RI) for each mouse was computed by this formula：(time spent with a novel object −time spent with a familiar object) / (time spent with a familiar object+ time spent with a novel object).

**S2. Immunofluorescence staining**

The immunofluorescence staining methods as previously described *in vivo* (Wang et al., 2017) and *in vitro* (Yuan et al., 2022). For *in vivo* analysis, the mouse brains were collected and performed to prepare forzen brain sleces (20-μm thick). Brain sections were blocked and incubated with PSD95 antibodies (1:300; Millipore) and Synapsin-1 antibodies (1:200; Cell Signaling Technology) overnight at 4 ◦C. After the secondary antibody incubation (Alexa − 488 or − 594, Proteintech), slides were incubated with 4',6-diamidino-2-phenylindole （DAPI） and imaged with a confocal microscope (ZEISS, Germany) followed by three-dimensional reconstruction using ZEISS-Elements Advanced Research software.

For *in vitro* analysis, SH-SY5Y cells were collected and fixed with 4% paraformaldehyde and treated with 0.02% Triton X100. After blocking in 10 % goat serum for 1 h, the cells were treated with primary antibodies included mouse anti-NLRP3, rabbit anti-caspase 1 p20, rabbit anti-CYP1A1 and incubated at 4 °C overnight, respectively. Then, the cells were treated with secondary antibody incubation (Alexa − 488 or − 594, Proteintech) for 1 h. The nuclei was counterstained with DAPI and images were obtained under a confocal microscope.

**S3. Western blot analysis**

Total protein was extracted from mouse brain or SH-SY5Y cells using RIPA buffer with 1 mM PMSF and 2% phosphatase inhibitor cocktail. Equal amounts of total protein were separated by SDS-PAGE and transferred onto nitrocellulose (NC) membranes. Subsequently, the NC membranes were sealed in 5% skim milk for 2 h and incubated with the following primary antibodies: mouse anti-AhR (1:3000), mouse anti-NLRP3 (1:3000), rabbit anti-ASC (1:1000), rabbit anti-caspase1 p20 (1:1000), mouse anti-N-GSDMD (1:3000), mouse anti-GSDMD (1:3000), rabbit anti-ASC (1:1000), and rabbit anti-CYP1A1 (1:1000) at 4°C overnight. After that, the membranes were cleaned three times with PBST and incubated in an HRP-labeled secondary antibody for 1 h at room temperature, followed by an ECL detection reagent to observe protein bands.

**Reference**

Wang, C., Zhao, Y., Wang, L., Pan, S., Liu, Y., Li, S., Wang, D., 2021. C-phycocyanin Mitigates Cognitive Impairment in Doxorubicin-Induced Chemobrain: Impact on Neuroinflammation, Oxidative Stress, and Brain Mitochondrial and Synaptic Alterations. Neurochem Res 46, 149–158. https://doi.org/10.1007/s11064-020-03164-2

Wang, D., Cao, L., Pan, S., Wang, G., Wang, L., Cao, N., Hao, X., 2021. Sirt3-mediated mitochondrial dysfunction is involved in fluoride-induced cognitive deficits. Food and Chemical Toxicology 158, 112665. https://doi.org/10.1016/j.fct.2021.112665

Wang, D., Cao, L., Zhou, X., Wang, G., Ma, Y., Hao, X., Fan, H., 2022. Mitigation of honokiol on fluoride-induced mitochondrial oxidative stress, mitochondrial dysfunction, and cognitive deficits through activating AMPK/PGC-1α/Sirt3. Journal of Hazardous Materials 437, 129381. https://doi.org/10.1016/j.jhazmat.2022.129381

Wang, D., Liu, X., Liu, Y., Shen, G., Zhu, X., Li, S., 2017. Treatment effects of Cardiotrophin-1 (CT-1) on streptozotocin-induced memory deficits in mice. Experimental Gerontology 92, 42–45. https://doi.org/10.1016/j.exger.2017.03.007

Yuan, Q., Wu, Y., Wang, G., Zhou, X., Dong, X., Lou, Z., Li, S., Wang, D., 2022. Preventive effects of arctigenin from Arctium lappa L against LPS-induced neuroinflammation and cognitive impairments in mice. Metab Brain Dis. https://doi.org/10.1007/s11011-022-01031-3
